# Supplementary material
Source: MDPI journal article supplement (https://www.mdpi.com/2313-0105/5/1/32)
Supplement: s1 [file s1]

Supporting Information

# Improved Discharge Capacity of Zinc Particles by Applying Bismuth Doped Silica Coating for Zinc-Based Batteries

Tobias Michlik <sup>1,\*</sup>, Andreas Rosin <sup>1</sup>, Thorsten Gerdes <sup>1</sup> and Ralf Moos <sup>2</sup>

<sup>1</sup> Department of Materials Processing, University of Bayreuth, 95447 Bayreuth, Germany; andreas.rosin@uni-bayreuth.de (A.R.); thorsten.gerdes@uni-bayreuth.de (T.G.)

<sup>2</sup> Department of Functional Materials, Bayerisches Zentrum für Batterietechnik (BayBatt), Zentrum für Energietechnik (ZET), University of Bayreuth, 95447 Bayreuth, Germany; Functional.Materials@uni-bayreuth.de

\* Correspondence: tobias.michlik@uni-bayreuth.de; Tel.: +49-92155-7208

Received: 11 January 2019; Accepted: 11 March 2019; Published: date

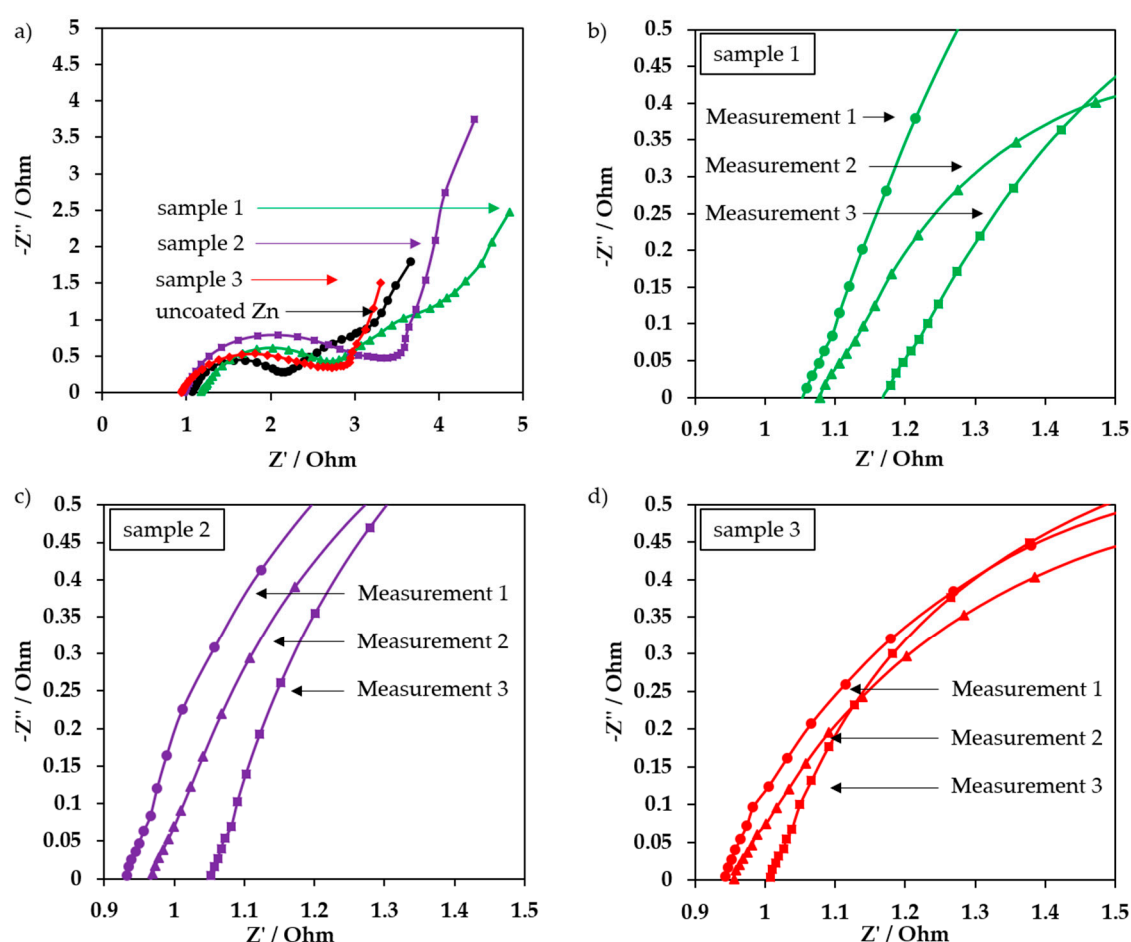

**Figure S1.** (a) Exemplary Nyquist plots of uncoated zinc, sample 1, sample 2 and sample 3. (b–d) Zoom on high-frequency region of EIS to determine  $R_i$  from three measurements for sample 1, sample 2, and sample 3
